# Supplementary material
Source: publisher figshare collection journal article supplement (https://acs.figshare.com/ndownloader/files/4603441)
Supplement: Supplementary file 1 [file 4603441]

# CIF-file generated for C24H58N3ScSi3                Pbca       q1165      
#==============================================================================
data_DATNAM
#==============================================================================

# 0. AUDIT DETAILS

_audit_creation_date                 '2006-10-10  08:58:17'
_audit_creation_method              
;
 PLATON <TABLE ACC> option    (version :: 210806)
 SHELXL97-2 & Manual Editing 
;
_audit_update_record                
;
?

2008-05-15 # Formatted by publCIF
;

#===============================================================================

# 1. SUBMISSION DETAILS

_publ_contact_author_name           # Name  of author for correspondence
;
   Drs. A. Meetsma
;
_publ_contact_author_address        # Address of author for correspondence
;
  Crystal Structure Center, Chemical Physics,
  Zernike Institute for Advanced Materials,
  University of Groningen,
  Nijenborgh 4,
  NL-9747 AG Groningen, The Netherlands.
;
_publ_contact_author_email           A.Meetsma@rug.nl
_publ_contact_author_fax             '+31 50 3634441'
_publ_contact_author_phone           '+31 50 3634368'

_publ_requested_journal               'Organometallics'  
# Publication choise FI, CI or EI for Inorganic
#                    FM, CM or EM for Metal-organic
#                    FO, CO or EO for Organic
_publ_requested_category             ?
_publ_requested_coeditor_name        ?

_publ_contact_letter                # Include date of submission
;
 Date of submission :  2008-05-15  11:29:17

 Consider this CIF submission for deposition of the second
 X-ray structure of a manuscript to be submitted to :  'Organometallics' 
  (Our Compound_Identification_Code : Q1165)
;

#===============================================================================

# 2. PROCESSING SUMMARY (JOURNAL OFFICE ONLY)

_journal_date_recd_electronic        ?

_journal_date_to_coeditor            ?
_journal_date_from_coeditor          ?
_journal_date_accepted               ?

_journal_date_printers_first         ?
_journal_date_printers_final         ?
_journal_date_proofs_out             ?
_journal_date_proofs_in              ?

_journal_coeditor_name               ?
_journal_coeditor_code               ?
_journal_coeditor_notes             
;
;

_journal_techeditor_code             ?
_journal_techeditor_notes           
;
;

_journal_coden_ASTM                  ?
_journal_name_full                   ?
_journal_year                        ?
_journal_volume                      ?
_journal_issue                       ?
_journal_page_first                  ?
_journal_page_last                   ?


_journal_suppl_publ_number           ?
_journal_suppl_publ_pages            ?


#===============================================================================

# 3. TITLE AND AUTHOR LIST

_publ_section_title                 
;
Title (type here to add)
;
_publ_section_title_footnote        
.

# The loop structure below should contain the names and adresses of all
# authors, in the required order of publication. Repeat as necessary.


loop_
_publ_author_name                   
_publ_author_footnote               
_publ_author_address                
'?' # author name
;   # author related footnote
;
;   # Address of this author
;
   'Meetsma, Auke'
;
 ? # author related footnote
;
;
  Crystal Structure Center, Chemical Physics,
  Zernike Institute for Advanced Materials,
  University of Groningen,
  Nijenborgh 4,
  NL-9747 AG Groningen, The Netherlands.
;

#===============================================================================

# 4. TEXT

_publ_section_synopsis              
.
_publ_section_abstract              
;
(type here to add abstract)
;

# Insert blank lines between paragraphs

_publ_section_comment               
;
(type here to add)
;
_publ_section_exptl_prep            
;
(type here to add preparation details)
;
_publ_section_exptl_refinement      
;
(type here to add refinement details)
;

# Insert blank lines between references

_publ_section_references            
;
Allen, F. H. (2002). <i>Acta Cryst.</i> B<b>58</b>, 380--388.

Beurskens, P.T., Beurskens, G., Gelder, R. de, Garc\'ia-Granda, S. Gould, R.O.,
Isra\"el, & Smits, J.M.M.   (1999). The <i>DIRDIF99</i> program system,
Technical Report of the Crystallography Laboratory, University of Nijmegen,
The Netherlands.

Bondi, A. (1964). <i>J. Phys. Chem.</i> <b>68</b>, 441--451.

Bruker,   (2006). <i>SMART</i>, <i>SAINTPLUS</i>, <i>XPREP</i> and
<i>SADABS</i>.Software Reference Manual Bruker AXS Inc. Madison, Wisconsin,
USA.

Hahn, T. (1983). International Tables for Crystallography, Volume A,
Space-group symmetry, Kluwer Academic Publishers, Dordrecht, The Netherlands.

Le Page, Y. (1987). <i>J. Appl. Cryst.</i> <b>20</b>, 264--269.

Le Page, Y. (1988). <i>J. Appl. Cryst.</i> <b>21</b>, 983--984.

Meetsma, A. (2006). Extended version of the program <i>PLUTO</i>. University of
Groningen, The Netherlands. (unpublished).

Sheldrick, G. M. (1997). <i>SHELXL97</i>. Program for Crystal Structure
Refinement. University of G\"ottingen, Germany.

Spek, A. L. (1988). <i>J. Appl. Cryst.</i> <b>21</b>, 578--579.

Spek, A. L. (1990). <i>Acta Cryst.</i> A46 C-34.

Spek, A. L. (2003). <i>J. Appl. Cryst.</i> <b>36</b>, 7--13.

Wilson, A. J. C. (1992). International Tables for Crystallography, Volume C,
Kluwer Academic Publishers, Dordrecht, The Netherlands.
;


_publ_section_figure_captions       
;


Fig. 1. Perspective <i>PLUTO</i> drawing of the molecule illustrating the
configuration and the adopted numbering scheme.

Fig. 2. Molecular packing viewed down unit cell axes.

Fig. 3. Perspective <i>ORTEP</i> drawing of the title compound. Displacement
ellipsoids for non-H are represented at the 50% probability level. The H-atoms
have been omitted to improve clarity.
;

#===============================================================================

# 5. CHEMICAL DATA

_chemical_name_systematic           
;
;
_chemical_name_common                ?
_chemical_melting_point              ?
_chemical_formula_moiety            
'C24 H58 N3 Sc Si3'
# Ex: 'C12 H16 N2 O6, H2 O' and '(Cd 2+)3, (C6 N6 Cr 3-)2, 2(H2 O)' 
_chemical_formula_structural         ?
_chemical_formula_sum               
'C24 H58 N3 Sc Si3'
_chemical_formula_iupac              ?
_chemical_formula_weight                517.96
_chemical_compound_source           'see text'

loop_
_atom_type_symbol                   
_atom_type_description              
_atom_type_scat_dispersion_real     
_atom_type_scat_dispersion_imag     
_atom_type_scat_source              
Si  Si    0.0817    0.0704
 'International Tables Vol C Tables 4.2.6.8 and 6.1.1.4'
Sc  Sc    0.2519    0.3716
 'International Tables Vol C Tables 4.2.6.8 and 6.1.1.4'
 N   N    0.0061    0.0033
 'International Tables Vol C Tables 4.2.6.8 and 6.1.1.4'
 H   H    0.0000    0.0000
 'International Tables Vol C Tables 4.2.6.8 and 6.1.1.4'
 C   C    0.0033    0.0016
 'International Tables Vol C Tables 4.2.6.8 and 6.1.1.4'

#===============================================================================

# 6. CRYSTAL DATA

_symmetry_cell_setting               Orthorhombic
_symmetry_space_group_name_Hall      '-P 2ac 2ab'
_symmetry_space_group_name_H-M       'P b c a'
_symmetry_Int_Tables_number                 61

loop_
_symmetry_equiv_pos_site_id         
_symmetry_equiv_pos_as_xyz          
   1 x,y,z                         
   2 1/2-x,-y,1/2+z                
   3 1/2+x,1/2-y,-z                
   4 -x,1/2+y,1/2-z                
   5 -x,-y,-z                      
   6 1/2+x,y,1/2-z                 
   7 1/2-x,1/2+y,z                 
   8 x,1/2-y,1/2+z                 

_cell_length_a                           18.668(2)
_cell_length_b                           17.479(2)
_cell_length_c                           19.473(2)
_cell_angle_alpha                        90
_cell_angle_beta                         90
_cell_angle_gamma                        90
_cell_volume                            6354.0(12)
_cell_formula_units_Z                 8

_cell_measurement_temperature    100(1)
_cell_measurement_reflns_used      7591
_cell_measurement_theta_min        2.47
_cell_measurement_theta_max       29.01
_cell_special_details
;
 The final unit cell was obtained from the xyz centroids of 
   7591 reflections after integration using the SAINTPLUS 
   software package (Bruker, 2000). 

 Reduced cell calculations did not indicate any higher metric lattice symmetry
   and examination of the finalatomic coordinates of the structure did not
   yield extra symmetry elements (Spek, 1988; Le Page 1987, 1988)
;

_exptl_crystal_description       'block'
_exptl_crystal_colour            'colorless'
_exptl_crystal_size_max           0.53 
_exptl_crystal_size_mid           0.38 
_exptl_crystal_size_min           0.24 
_exptl_crystal_size_rad           ? 
_exptl_crystal_density_meas       ? 
_exptl_crystal_density_diffrn     1.083 
_exptl_crystal_density_method     'not measured' 
_exptl_crystal_F_000              2288 
_exptl_absorpt_coefficient_mu     0.360 
_exptl_absorpt_correction_type    'Multi-Scan'                
_exptl_absorpt_process_details    '(SADABS, Sheldrick, Bruker, 2006))'
_exptl_absorpt_correction_T_min    0.8244
_exptl_absorpt_correction_T_max    0.9172

#===============================================================================

# 7. EXPERIMENTAL DATA

_exptl_special_details              
;
 ?
;
_diffrn_ambient_temperature            100(1)
_diffrn_radiation_wavelength           0.71073
_diffrn_radiation_type               'MoK\a'
_diffrn_radiation_source             'fine focus sealed Siemens Mo tube '
_diffrn_radiation_monochromator      'parallel mounted graphite'
_diffrn_radiation_detector          
;
  CCD area-detector
;
_diffrn_measurement_device_type     
;
  Bruker Smart Apex; CCD area detector 
;
_diffrn_measurement_method           '\f and \w scans'
_diffrn_special_details             
;
 Crystal into the cold nitrogen stream of the low-temparature unit
   (KRYOFLEX, (Bruker, 2000)).
;
_diffrn_detector_area_resol_mean     66.06 

_diffrn_standards_number             0
_diffrn_standards_interval_count     ?
_diffrn_standards_interval_time      ?
_diffrn_standards_decay_%            0

loop_
_diffrn_standard_refln_index_h      
_diffrn_standard_refln_index_k      
_diffrn_standard_refln_index_l      
 ? ? ?

# number of measured reflections (redundant set)
_diffrn_reflns_number             50937 
_diffrn_reflns_av_R_equivalents   0.0407 
_diffrn_reflns_av_sigmaI/netI     0.0253 
_diffrn_reflns_limit_h_min        -23 
_diffrn_reflns_limit_h_max        23 
_diffrn_reflns_limit_k_min        -22 
_diffrn_reflns_limit_k_max        22 
_diffrn_reflns_limit_l_min        -24 
_diffrn_reflns_limit_l_max        24 
_diffrn_reflns_theta_min          2.55 
_diffrn_reflns_theta_max          27.10 
_diffrn_measured_fraction_theta_max    0.998 
_diffrn_reflns_theta_full              25.00 
_diffrn_measured_fraction_theta_full   0.997 

_diffrn_reflns_reduction_process    
;
 Intensity data were corrected for Lorentz and polarization
  effects, decay and absorption and reduced to F~o~^2^
  using SAINT (Bruker, 2006) and SADABS (Sheldrick, 2006)
;

# number of unique reflections
_reflns_number_total              6998 
_reflns_number_gt                 5990 
_reflns_threshold_expression     I>2\s(I)   
 

_computing_data_collection          'SMART, Version 5.624, (Bruker, 2006'
_computing_cell_refinement          'SAINTPLUS, Version 6.45, (Bruker, 2006)'
_computing_data_reduction           'XPREP, Version 5.1/NT, (Bruker, 2006)'
_computing_structure_solution       
;
 DIRDIF-99 (Beurskens et al., 1999)
;
_computing_structure_refinement      'SHELXL-97 (Sheldrick, 1997)'
_computing_molecular_graphics       
;
 PLUTO (Meetsma, 2006) 
 PLATON (Spek, 2003)
;
_computing_publication_material      'PLATON (Spek, 2003)' 

#===============================================================================

# 8. REFINEMENT DATA

 
_refine_special_details 
; 
 Refinement of F^2^ against ALL reflections.  The weighted R-factor wR and 
 goodness of fit S are based on F^2^, conventional R-factors R are based 
 on F, with F set to zero for negative F^2^. The threshold expression of 
 F^2^ > 2sigma(F^2^) is used only for calculating R-factors(gt) etc. and is 
 not relevant to the choice of reflections for refinement.  R-factors based 
 on F^2^ are statistically about twice as large as those based on F, and R- 
 factors based on ALL data will be even larger. 
; 
 
_refine_ls_structure_factor_coef Fsqd   
_refine_ls_matrix_type            full 
_refine_ls_weighting_scheme       calc  
_refine_ls_weighting_details 
 'calc w=1/[\s^2^(Fo^2^)+(0.0427P)^2^+2.8215P] where P=(Fo^2^+2Fc^2^)/3' 
_atom_sites_solution_primary      heavy   # heavy,direct,difmap,geom  
_atom_sites_solution_secondary    direct  # difmap 
_atom_sites_solution_hydrogens    difmap  # geom 
_refine_ls_hydrogen_treatment     refall  # none, undef, noref, refall,
                                          # refxyz, refU, constr or mixed
_refine_ls_extinction_method      none 
_refine_ls_extinction_coef        ? 
_refine_ls_abs_structure_details  ? 
_chemical_absolute_configuration  '.' 
_refine_ls_abs_structure_Flack    ? 
_refine_ls_number_reflns          6998 
_refine_ls_number_parameters      512 
_refine_ls_number_restraints      0 
_refine_ls_number_constraints     ? 
_refine_ls_R_factor_all           0.0445 
_refine_ls_R_factor_gt            0.0352 
_refine_ls_wR_factor_ref          0.0853 
_refine_ls_wR_factor_gt           0.0811 
_refine_ls_goodness_of_fit_ref    1.056 
_refine_ls_restrained_S_all       1.056 
_refine_ls_shift/su_max           0.001 
_refine_ls_shift/su_mean          0.000 
 
_refine_diff_density_max          0.419 
_refine_diff_density_min         -0.212 
_refine_diff_density_rms          0.057 

_vrn_publ_code_frame_time_sec       10.0
_vrn_publ_code_meas_time_hour       10.4
 
#===============================================================================

# 9. ATOMIC COORDINATES AND DISPLACEMENT PARAMETERS

loop_
_atom_site_label                    
_atom_site_type_symbol              
_atom_site_thermal_displace_type    
_atom_site_fract_x                  
_atom_site_fract_y                  
_atom_site_fract_z                  
_atom_site_occupancy                
_atom_site_U_iso_or_equiv           
_atom_site_calc_flag                
_atom_site_refinement_flags         
Sc Sc Uani 0.16542(1) 0.38063(1) 0.18377(1) 1.000 0.0114(1) . .                 
Si1 Si Uani 0.27587(2) 0.33925(2) 0.01963(2) 1.000 0.0160(1) . .                
Si2 Si Uani 0.03439(2) 0.54315(2) 0.13471(2) 1.000 0.0180(1) . .                
Si3 Si Uani 0.05186(2) 0.22543(2) 0.11256(2) 1.000 0.0158(1) . .                
N1 N Uani 0.25269(7) 0.47791(7) 0.21908(6) 1.000 0.0147(3) . .                  
N2 N Uani 0.26999(7) 0.32701(7) 0.24893(6) 1.000 0.0137(3) . .                  
N3 N Uani 0.14801(6) 0.40088(7) 0.31117(6) 1.000 0.0136(3) . .                  
C1 C Uani 0.24633(9) 0.55246(9) 0.18300(9) 1.000 0.0208(5) . .                  
C2 C Uani 0.32535(8) 0.44722(9) 0.20392(9) 1.000 0.0175(4) . .                  
C3 C Uani 0.33091(8) 0.36058(9) 0.21060(8) 1.000 0.0168(4) . .                  
C4 C Uani 0.27920(9) 0.24281(9) 0.24806(8) 1.000 0.0177(4) . .                  
C5 C Uani 0.27126(8) 0.35367(9) 0.32154(8) 1.000 0.0162(4) . .                  
C6 C Uani 0.22208(8) 0.42156(8) 0.33523(8) 1.000 0.0152(4) . .                  
C7 C Uani 0.22807(9) 0.44029(10) 0.41240(8) 1.000 0.0210(5) . .                 
C8 C Uani 0.24497(8) 0.49226(9) 0.29428(8) 1.000 0.0162(4) . .                  
C9 C Uani 0.11885(8) 0.32963(9) 0.34321(8) 1.000 0.0172(5) . .                  
C10 C Uani 0.03888(9) 0.33576(9) 0.33089(9) 1.000 0.0209(5) . .                 
C11 C Uani 0.02403(9) 0.41981(10) 0.34629(11) 1.000 0.0274(6) . .               
C12 C Uani 0.09345(8) 0.46192(9) 0.32732(8) 1.000 0.0173(4) . .                 
C13 C Uani 0.21298(9) 0.38906(9) 0.07676(8) 1.000 0.0161(4) . .                 
C14 C Uani 0.24675(10) 0.34125(10) -0.07322(8) 1.000 0.0210(5) . .              
C15 C Uani 0.36786(10) 0.38326(12) 0.02211(10) 1.000 0.0280(6) . .              
C16 C Uani 0.28720(12) 0.23479(10) 0.03959(10) 1.000 0.0280(6) . .              
C17 C Uani 0.06338(8) 0.44739(9) 0.16206(8) 1.000 0.0164(4) . .                 
C18 C Uani 0.05110(12) 0.62128(11) 0.19953(13) 1.000 0.0357(7) . .              
C19 C Uani -0.06538(10) 0.54961(13) 0.12126(12) 1.000 0.0338(6) . .             
C20 C Uani 0.07926(11) 0.56975(13) 0.05226(11) 1.000 0.0338(6) . .              
C21 C Uani 0.12355(8) 0.25889(9) 0.17042(8) 1.000 0.0153(4) . .                 
C22 C Uani 0.05122(11) 0.11773(10) 0.10499(12) 1.000 0.0325(6) . .              
C23 C Uani -0.03903(9) 0.25574(10) 0.14340(10) 1.000 0.0228(5) . .              
C24 C Uani 0.06106(10) 0.26140(12) 0.02210(9) 1.000 0.0265(6) . .               
H1 H Uiso 0.2821(10) 0.5871(11) 0.1993(9) 1.000 0.022(5) . .                    
H1' H Uiso 0.1995(10) 0.5737(10) 0.1916(9) 1.000 0.022(5) . .                   
H1" H Uiso 0.2533(9) 0.5449(10) 0.1345(9) 1.000 0.017(4) . .                    
H2 H Uiso 0.3580(10) 0.4730(10) 0.2333(9) 1.000 0.018(4) . .                    
H2' H Uiso 0.3365(9) 0.4608(10) 0.1587(10) 1.000 0.018(4) . .                   
H3 H Uiso 0.3310(9) 0.3382(9) 0.1669(9) 1.000 0.013(4) . .                      
H3' H Uiso 0.3753(10) 0.3468(10) 0.2328(9) 1.000 0.019(4) . .                   
H4 H Uiso 0.3224(10) 0.2301(10) 0.2722(9) 1.000 0.018(4) . .                    
H4' H Uiso 0.2830(9) 0.2254(9) 0.2012(9) 1.000 0.012(4) . .                     
H4" H Uiso 0.2396(10) 0.2174(10) 0.2714(9) 1.000 0.016(4) . .                   
H5 H Uiso 0.3194(9) 0.3674(9) 0.3349(9) 1.000 0.012(4) . .                      
H5' H Uiso 0.2568(9) 0.3136(10) 0.3508(9) 1.000 0.015(4) . .                    
H7 H Uiso 0.2027(10) 0.4861(12) 0.4246(10) 1.000 0.029(5) . .                   
H7' H Uiso 0.2775(11) 0.4493(11) 0.4235(10) 1.000 0.028(5) . .                  
H7" H Uiso 0.2107(10) 0.4006(12) 0.4384(10) 1.000 0.029(5) . .                  
H8 H Uiso 0.2100(10) 0.5302(10) 0.2986(9) 1.000 0.017(4) . .                    
H8' H Uiso 0.2889(9) 0.5099(10) 0.3113(8) 1.000 0.013(4) . .                    
H9 H Uiso 0.1304(9) 0.3278(9) 0.3922(9) 1.000 0.017(4) . .                      
H9' H Uiso 0.1404(9) 0.2852(10) 0.3218(9) 1.000 0.015(4) . .                    
H10 H Uiso 0.0117(10) 0.3033(10) 0.3594(9) 1.000 0.018(4) . .                   
H10' H Uiso 0.0286(9) 0.3240(10) 0.2847(10) 1.000 0.017(4) . .                  
H11 H Uiso 0.0136(11) 0.4261(12) 0.3933(11) 1.000 0.036(6) . .                  
H11' H Uiso -0.0138(12) 0.4377(12) 0.3217(11) 1.000 0.038(6) . .                
H12 H Uiso 0.0876(9) 0.4942(10) 0.2888(9) 1.000 0.017(4) . .                    
H12' H Uiso 0.1093(9) 0.4933(10) 0.3657(9) 1.000 0.019(4) . .                   
H13 H Uiso 0.1678(12) 0.3779(12) 0.0604(11) 1.000 0.039(6) . .                  
H13' H Uiso 0.2196(11) 0.4389(13) 0.0688(11) 1.000 0.039(6) . .                 
H14 H Uiso 0.2062(11) 0.3097(12) -0.0802(10) 1.000 0.030(5) . .                 
H14' H Uiso 0.2822(12) 0.3244(12) -0.1014(11) 1.000 0.038(6) . .                
H14" H Uiso 0.2338(11) 0.3910(13) -0.0883(11) 1.000 0.037(6) . .                
H15 H Uiso 0.3684(12) 0.4350(14) 0.0170(12) 1.000 0.046(7) . .                  
H15' H Uiso 0.3972(12) 0.3628(12) -0.0126(11) 1.000 0.039(6) . .                
H15" H Uiso 0.3914(12) 0.3743(12) 0.0643(12) 1.000 0.044(6) . .                 
H16 H Uiso 0.3123(11) 0.2265(11) 0.0806(11) 1.000 0.033(5) . .                  
H16' H Uiso 0.3119(12) 0.2096(12) 0.0058(11) 1.000 0.039(6) . .                 
H16" H Uiso 0.2444(12) 0.2100(12) 0.0436(11) 1.000 0.038(6) . .                 
H17 H Uiso 0.0525(10) 0.4177(12) 0.1250(10) 1.000 0.031(5) . .                  
H17' H Uiso 0.0314(10) 0.4312(11) 0.1965(10) 1.000 0.023(5) . .                 
H18 H Uiso 0.0208(17) 0.6129(16) 0.2380(16) 1.000 0.079(10) . .                 
H18' H Uiso 0.0352(14) 0.6676(16) 0.1800(13) 1.000 0.061(8) . .                 
H18" H Uiso 0.0971(18) 0.6274(17) 0.2128(16) 1.000 0.083(10) . .                
H19 H Uiso -0.0829(13) 0.5087(14) 0.0954(12) 1.000 0.049(7) . .                 
H19' H Uiso -0.0792(14) 0.5959(15) 0.0995(13) 1.000 0.062(8) . .                
H19" H Uiso -0.0904(13) 0.5513(14) 0.1652(13) 1.000 0.055(7) . .                
H20 H Uiso 0.1285(14) 0.5718(13) 0.0585(12) 1.000 0.048(6) . .                  
H20' H Uiso 0.0618(14) 0.6162(15) 0.0378(13) 1.000 0.062(8) . .                 
H20" H Uiso 0.0702(14) 0.5329(16) 0.0194(14) 1.000 0.064(8) . .                 
H21 H Uiso 0.1666(10) 0.2348(10) 0.1530(10) 1.000 0.022(5) . .                  
H21' H Uiso 0.1147(11) 0.2361(12) 0.2126(12) 1.000 0.039(6) . .                 
H22 H Uiso 0.0949(13) 0.1017(13) 0.0847(12) 1.000 0.049(7) . .                  
H22' H Uiso 0.0148(13) 0.0987(13) 0.0771(12) 1.000 0.048(6) . .                 
H22" H Uiso 0.0462(13) 0.0954(14) 0.1494(13) 1.000 0.053(7) . .                 
H23 H Uiso -0.0462(12) 0.2364(13) 0.1890(13) 1.000 0.048(7) . .                 
H23' H Uiso -0.0756(12) 0.2347(12) 0.1170(11) 1.000 0.040(6) . .                
H23" H Uiso -0.0425(11) 0.3087(13) 0.1426(10) 1.000 0.034(6) . .                
H24 H Uiso 0.0551(12) 0.3141(14) 0.0197(11) 1.000 0.040(6) . .                  
H24' H Uiso 0.0252(12) 0.2380(12) -0.0056(11) 1.000 0.043(6) . .                
H24" H Uiso 0.1053(12) 0.2506(12) 0.0030(11) 1.000 0.039(6) . .                 

loop_
_atom_site_aniso_label              
_atom_site_aniso_U_11               
_atom_site_aniso_U_22               
_atom_site_aniso_U_33               
_atom_site_aniso_U_23               
_atom_site_aniso_U_13               
_atom_site_aniso_U_12               
Sc 0.0111(1) 0.0108(1) 0.0123(1) -0.0007(1) 0.0000(1) 0.0000(1)                 
Si1 0.0160(2) 0.0185(2) 0.0135(2) -0.0017(2) 0.0008(2) 0.0018(2)                
Si2 0.0141(2) 0.0169(2) 0.0229(2) 0.0039(2) 0.0005(2) 0.0020(2)                 
Si3 0.0138(2) 0.0145(2) 0.0192(2) -0.0026(2) -0.0017(2) -0.0010(2)              
N1 0.0142(6) 0.0131(6) 0.0168(6) -0.0006(5) 0.0007(5) -0.0006(5)                
N2 0.0141(6) 0.0134(6) 0.0135(6) -0.0015(5) -0.0015(5) 0.0015(5)                
N3 0.0126(6) 0.0121(6) 0.0161(6) -0.0001(5) 0.0009(5) 0.0001(5)                 
C1 0.0225(8) 0.0139(7) 0.0260(9) 0.0013(6) -0.0004(7) -0.0030(6)                
C2 0.0125(7) 0.0204(8) 0.0195(8) -0.0035(6) 0.0031(6) -0.0029(6)                
C3 0.0122(7) 0.0215(8) 0.0167(8) -0.0008(6) 0.0007(6) 0.0032(6)                 
C4 0.0188(8) 0.0154(7) 0.0188(8) -0.0007(6) -0.0042(6) 0.0051(6)                
C5 0.0157(8) 0.0195(8) 0.0133(7) -0.0005(6) -0.0029(6) 0.0007(6)                
C6 0.0144(7) 0.0173(7) 0.0140(7) -0.0031(6) -0.0016(5) -0.0012(6)               
C7 0.0217(8) 0.0251(9) 0.0163(8) -0.0057(7) -0.0004(6) -0.0016(7)               
C8 0.0131(7) 0.0155(7) 0.0201(8) -0.0054(6) 0.0013(6) -0.0016(6)                
C9 0.0199(8) 0.0164(8) 0.0154(8) 0.0021(6) 0.0011(6) -0.0031(6)                 
C10 0.0185(8) 0.0230(8) 0.0213(9) 0.0006(7) 0.0034(6) -0.0051(6)                
C11 0.0173(9) 0.0274(9) 0.0374(11) -0.0041(8) 0.0088(8) -0.0002(7)              
C12 0.0155(7) 0.0167(7) 0.0196(8) -0.0031(6) 0.0025(6) 0.0018(6)                
C13 0.0158(8) 0.0148(7) 0.0178(8) -0.0009(6) 0.0005(6) -0.0003(6)               
C14 0.0235(9) 0.0239(9) 0.0155(8) -0.0019(6) 0.0009(6) -0.0005(7)               
C15 0.0183(9) 0.0446(12) 0.0210(9) -0.0055(8) 0.0032(7) -0.0027(8)              
C16 0.0392(11) 0.0223(9) 0.0225(9) -0.0035(7) -0.0002(8) 0.0111(8)              
C17 0.0168(8) 0.0149(7) 0.0176(8) -0.0012(6) 0.0000(6) 0.0001(6)                
C18 0.0335(11) 0.0211(9) 0.0525(14) -0.0103(9) -0.0025(10) 0.0086(8)            
C19 0.0176(9) 0.0424(12) 0.0414(12) 0.0121(10) 0.0000(8) 0.0041(8)              
C20 0.0271(10) 0.0380(11) 0.0363(11) 0.0156(9) 0.0062(8) -0.0021(9)             
C21 0.0154(7) 0.0149(7) 0.0156(8) -0.0006(6) -0.0010(6) 0.0009(6)               
C22 0.0298(10) 0.0177(9) 0.0499(13) -0.0091(8) -0.0143(9) -0.0010(7)            
C23 0.0164(8) 0.0240(9) 0.0279(10) -0.0012(7) 0.0000(7) -0.0013(6)              
C24 0.0229(9) 0.0378(11) 0.0188(9) -0.0038(7) -0.0019(7) -0.0043(8)             

#===============================================================================

# 10. MOLECULAR GEOMETRY

_geom_special_details               
;
 Bond distances, angles etc. have been calculated using the
 rounded fractional coordinates. All su's are estimated
 from the variances of the (full) variance-covariance matrix.
 The cell esds are taken into account in the estimation of
 distances, angles and torsion angles
;

loop_
_geom_bond_atom_site_label_1        
_geom_bond_atom_site_label_2        
_geom_bond_distance                 
_geom_bond_site_symmetry_1          
_geom_bond_site_symmetry_2          
_geom_bond_publ_flag                
 Sc      N1       2.4532(13)                     .       .                   yes
 Sc      N2       2.5098(13)                     .       .                   yes
 Sc      N3       2.5270(12)                     .       .                   yes
 Sc      C13      2.2699(16)                     .       .                   yes
 Sc      C17      2.2735(16)                     .       .                   yes
 Sc      C21      2.2818(16)                     .       .                   yes
 Si1     C13      1.8368(17)                     .       .                   yes
 Si1     C14      1.8883(16)                     .       .                   yes
 Si1     C15        1.882(2)                     .       .                   yes
 Si1     C16      1.8787(18)                     .       .                   yes
 Si2     C17      1.8380(16)                     .       .                   yes
 Si2     C18        1.886(2)                     .       .                   yes
 Si2     C19      1.8842(19)                     .       .                   yes
 Si2     C20        1.870(2)                     .       .                   yes
 Si3     C21      1.8446(16)                     .       .                   yes
 Si3     C22      1.8883(18)                     .       .                   yes
 Si3     C23      1.8762(18)                     .       .                   yes
 Si3     C24      1.8782(18)                     .       .                   yes
 N1      C1         1.485(2)                     .       .                   yes
 N1      C2         1.488(2)                     .       .                   yes
 N1      C8         1.493(2)                     .       .                   yes
 N2      C3         1.482(2)                     .       .                   yes
 N2      C4         1.482(2)                     .       .                   yes
 N2      C5         1.489(2)                     .       .                   yes
 N3      C6       1.5040(19)                     .       .                   yes
 N3      C9         1.496(2)                     .       .                   yes
 N3      C12      1.5082(19)                     .       .                   yes
 C2      C3         1.524(2)                     .       .                   no 
 C5      C6         1.524(2)                     .       .                   no 
 C6      C7         1.542(2)                     .       .                   no 
 C6      C8         1.532(2)                     .       .                   no 
 C9      C10        1.516(2)                     .       .                   no 
 C10     C11        1.525(2)                     .       .                   no 
 C11     C12        1.536(2)                     .       .                   no 
 C1      H1        0.956(19)                     .       .                   no 
 C1      H1'       0.964(19)                     .       .                   no 
 C1      H1"       0.963(18)                     .       .                   no 
 C2      H2        0.950(18)                     .       .                   no 
 C2      H2'       0.936(19)                     .       .                   no 
 C3      H3        0.937(17)                     .       .                   no 
 C3      H3'       0.965(18)                     .       .                   no 
 C4      H4        0.960(18)                     .       .                   no 
 C4      H4'       0.965(17)                     .       .                   no 
 C4      H4"       0.975(18)                     .       .                   no 
 C5      H5        0.966(17)                     .       .                   no 
 C5      H5'       0.942(17)                     .       .                   no 
 C7      H7          0.96(2)                     .       .                   no 
 C7      H7'         0.96(2)                     .       .                   no 
 C7      H7"         0.92(2)                     .       .                   no 
 C8      H8        0.934(18)                     .       .                   no 
 C8      H8'       0.937(17)                     .       .                   no 
 C9      H9        0.979(18)                     .       .                   no 
 C9      H9'       0.969(17)                     .       .                   no 
 C10     H10       0.942(18)                     .       .                   no 
 C10     H10'      0.942(19)                     .       .                   no 
 C11     H11         0.94(2)                     .       .                   no 
 C11     H11'        0.91(2)                     .       .                   no 
 C12     H12       0.945(18)                     .       .                   no 
 C12     H12'      0.973(18)                     .       .                   no 
 C13     H13         0.92(2)                     .       .                   no 
 C13     H13'        0.89(2)                     .       .                   no 
 C14     H14         0.95(2)                     .       .                   no 
 C14     H14'        0.91(2)                     .       .                   no 
 C14     H14"        0.95(2)                     .       .                   no 
 C15     H15         0.91(2)                     .       .                   no 
 C15     H15'        0.94(2)                     .       .                   no 
 C15     H15"        0.95(2)                     .       .                   no 
 C16     H16         0.94(2)                     .       .                   no 
 C16     H16'        0.92(2)                     .       .                   no 
 C16     H16"        0.91(2)                     .       .                   no 
 C17     H17         0.91(2)                     .       .                   no 
 C17     H17'      0.941(19)                     .       .                   no 
 C18     H18         0.95(3)                     .       .                   no 
 C18     H18'        0.94(3)                     .       .                   no 
 C18     H18"        0.90(3)                     .       .                   no 
 C19     H19         0.93(2)                     .       .                   no 
 C19     H19'        0.95(3)                     .       .                   no 
 C19     H19"        0.98(3)                     .       .                   no 
 C20     H20         0.93(3)                     .       .                   no 
 C20     H20'        0.92(3)                     .       .                   no 
 C20     H20"        0.92(3)                     .       .                   no 
 C21     H21       0.969(19)                     .       .                   no 
 C21     H21'        0.93(2)                     .       .                   no 
 C22     H22         0.95(2)                     .       .                   no 
 C22     H22'        0.93(2)                     .       .                   no 
 C22     H22"        0.95(3)                     .       .                   no 
 C23     H23         0.96(2)                     .       .                   no 
 C23     H23'        0.93(2)                     .       .                   no 
 C23     H23"        0.93(2)                     .       .                   no 
 C24     H24         0.93(2)                     .       .                   no 
 C24     H24'        0.95(2)                     .       .                   no 
 C24     H24"        0.93(2)                     .       .                   no 

loop_
_geom_angle_atom_site_label_1       
_geom_angle_atom_site_label_2       
_geom_angle_atom_site_label_3       
_geom_angle                         
_geom_angle_site_symmetry_1         
_geom_angle_site_symmetry_2         
_geom_angle_site_symmetry_3         
_geom_angle_publ_flag               
 N1      Sc      N2         66.46(4)             .       .       .           yes
 N1      Sc      N3         73.33(4)             .       .       .           yes
 N1      Sc      C13        87.28(5)             .       .       .           yes
 N1      Sc      C17       104.64(5)             .       .       .           yes
 N1      Sc      C21       154.93(5)             .       .       .           yes
 N2      Sc      N3         69.88(4)             .       .       .           yes
 N2      Sc      C13       100.61(5)             .       .       .           yes
 N2      Sc      C17       159.61(5)             .       .       .           yes
 N2      Sc      C21        88.61(5)             .       .       .           yes
 N3      Sc      C13       160.48(5)             .       .       .           yes
 N3      Sc      C17        90.17(5)             .       .       .           yes
 N3      Sc      C21       101.44(5)             .       .       .           yes
 C13     Sc      C17        97.11(6)             .       .       .           yes
 C13     Sc      C21        95.16(6)             .       .       .           yes
 C17     Sc      C21        99.81(5)             .       .       .           yes
 C13     Si1     C14       112.78(8)             .       .       .           yes
 C13     Si1     C15       111.96(8)             .       .       .           yes
 C13     Si1     C16       114.04(8)             .       .       .           yes
 C14     Si1     C15       106.24(8)             .       .       .           yes
 C14     Si1     C16       104.39(8)             .       .       .           yes
 C15     Si1     C16       106.81(9)             .       .       .           yes
 C17     Si2     C18       114.64(9)             .       .       .           yes
 C17     Si2     C19       112.70(9)             .       .       .           yes
 C17     Si2     C20       110.08(9)             .       .       .           yes
 C18     Si2     C19      102.31(10)             .       .       .           yes
 C18     Si2     C20      108.70(10)             .       .       .           yes
 C19     Si2     C20      107.97(10)             .       .       .           yes
 C21     Si3     C22       111.61(8)             .       .       .           yes
 C21     Si3     C23       111.78(8)             .       .       .           yes
 C21     Si3     C24       113.60(8)             .       .       .           yes
 C22     Si3     C23       107.50(8)             .       .       .           yes
 C22     Si3     C24      105.13(10)             .       .       .           yes
 C23     Si3     C24       106.76(8)             .       .       .           yes
 Sc      N1      C1        114.99(9)             .       .       .           yes
 Sc      N1      C2        107.45(9)             .       .       .           yes
 Sc      N1      C8        109.11(9)             .       .       .           yes
 C1      N1      C2       107.17(12)             .       .       .           yes
 C1      N1      C8       108.00(12)             .       .       .           yes
 C2      N1      C8       110.07(12)             .       .       .           yes
 Sc      N2      C3        101.21(8)             .       .       .           yes
 Sc      N2      C4        117.09(9)             .       .       .           yes
 Sc      N2      C5        112.06(9)             .       .       .           yes
 C3      N2      C4       107.37(12)             .       .       .           yes
 C3      N2      C5       110.02(12)             .       .       .           yes
 C4      N2      C5       108.65(11)             .       .       .           yes
 Sc      N3      C6        102.78(8)             .       .       .           yes
 Sc      N3      C9        109.86(9)             .       .       .           yes
 Sc      N3      C12       113.00(8)             .       .       .           yes
 C6      N3      C9       113.88(11)             .       .       .           yes
 C6      N3      C12      112.70(11)             .       .       .           yes
 C9      N3      C12      104.85(11)             .       .       .           yes
 N1      C2      C3       113.79(12)             .       .       .           yes
 N2      C3      C2       112.61(12)             .       .       .           yes
 N2      C5      C6       113.59(12)             .       .       .           yes
 N3      C6      C5       108.20(11)             .       .       .           yes
 N3      C6      C7       114.91(12)             .       .       .           yes
 N3      C6      C8       106.75(12)             .       .       .           yes
 C5      C6      C7       106.99(13)             .       .       .           no 
 C5      C6      C8       111.66(12)             .       .       .           no 
 C7      C6      C8       108.41(12)             .       .       .           no 
 N1      C8      C6       113.71(12)             .       .       .           yes
 N3      C9      C10      103.51(12)             .       .       .           yes
 C9      C10     C11      102.48(13)             .       .       .           no 
 C10     C11     C12      105.14(14)             .       .       .           no 
 N3      C12     C11      106.32(12)             .       .       .           yes
 Sc      C13     Si1       140.83(9)             .       .       .           yes
 Sc      C17     Si2       140.17(8)             .       .       .           yes
 Sc      C21     Si3       127.87(8)             .       .       .           yes
 N1      C1      H1        110.1(11)             .       .       .           no 
 N1      C1      H1'       109.2(10)             .       .       .           no 
 N1      C1      H1"       109.5(11)             .       .       .           no 
 H1      C1      H1'       109.4(15)             .       .       .           no 
 H1      C1      H1"       108.6(15)             .       .       .           no 
 H1'     C1      H1"       110.2(15)             .       .       .           no 
 N1      C2      H2        107.1(11)             .       .       .           no 
 N1      C2      H2'       107.3(10)             .       .       .           no 
 C3      C2      H2        112.1(11)             .       .       .           no 
 C3      C2      H2'       108.5(11)             .       .       .           no 
 H2      C2      H2'       107.7(15)             .       .       .           no 
 N2      C3      H3        107.1(10)             .       .       .           no 
 N2      C3      H3'       109.6(11)             .       .       .           no 
 C2      C3      H3        109.7(10)             .       .       .           no 
 C2      C3      H3'       110.2(11)             .       .       .           no 
 H3      C3      H3'       107.5(15)             .       .       .           no 
 N2      C4      H4        108.8(11)             .       .       .           no 
 N2      C4      H4'       109.4(10)             .       .       .           no 
 N2      C4      H4"       111.1(11)             .       .       .           no 
 H4      C4      H4'       109.2(15)             .       .       .           no 
 H4      C4      H4"       107.7(15)             .       .       .           no 
 H4'     C4      H4"       110.7(14)             .       .       .           no 
 N2      C5      H5        110.4(10)             .       .       .           no 
 N2      C5      H5'       109.7(11)             .       .       .           no 
 C6      C5      H5        108.7(10)             .       .       .           no 
 C6      C5      H5'       107.5(11)             .       .       .           no 
 H5      C5      H5'       106.8(14)             .       .       .           no 
 C6      C7      H7        112.5(12)             .       .       .           no 
 C6      C7      H7'       108.9(12)             .       .       .           no 
 C6      C7      H7"       110.6(12)             .       .       .           no 
 H7      C7      H7'       106.3(16)             .       .       .           no 
 H7      C7      H7"       108.6(17)             .       .       .           no 
 H7'     C7      H7"       109.8(17)             .       .       .           no 
 N1      C8      H8        106.0(11)             .       .       .           no 
 N1      C8      H8'       108.5(10)             .       .       .           no 
 C6      C8      H8        109.3(11)             .       .       .           no 
 C6      C8      H8'       109.0(10)             .       .       .           no 
 H8      C8      H8'       110.3(15)             .       .       .           no 
 N3      C9      H9         110.7(9)             .       .       .           no 
 N3      C9      H9'       109.7(10)             .       .       .           no 
 C10     C9      H9        111.9(10)             .       .       .           no 
 C10     C9      H9'       113.4(10)             .       .       .           no 
 H9      C9      H9'       107.6(14)             .       .       .           no 
 C9      C10     H10       113.2(11)             .       .       .           no 
 C9      C10     H10'      109.7(10)             .       .       .           no 
 C11     C10     H10       111.5(11)             .       .       .           no 
 C11     C10     H10'      111.2(11)             .       .       .           no 
 H10     C10     H10'      108.8(15)             .       .       .           no 
 C10     C11     H11       109.9(13)             .       .       .           no 
 C10     C11     H11'      111.7(13)             .       .       .           no 
 C12     C11     H11       110.6(13)             .       .       .           no 
 C12     C11     H11'      111.4(14)             .       .       .           no 
 H11     C11     H11'      108.1(19)             .       .       .           no 
 N3      C12     H12       109.6(11)             .       .       .           no 
 N3      C12     H12'      110.7(10)             .       .       .           no 
 C11     C12     H12       112.3(10)             .       .       .           no 
 C11     C12     H12'      110.0(10)             .       .       .           no 
 H12     C12     H12'      108.0(15)             .       .       .           no 
 Sc      C13     H13        86.9(14)             .       .       .           no 
 Sc      C13     H13'      106.1(14)             .       .       .           no 
 Si1     C13     H13       106.0(13)             .       .       .           no 
 Si1     C13     H13'      105.6(14)             .       .       .           no 
 H13     C13     H13'      105.8(19)             .       .       .           no 
 Si1     C14     H14       110.9(12)             .       .       .           no 
 Si1     C14     H14'      111.3(14)             .       .       .           no 
 Si1     C14     H14"      112.7(13)             .       .       .           no 
 H14     C14     H14'      107.9(18)             .       .       .           no 
 H14     C14     H14"      106.6(18)             .       .       .           no 
 H14'    C14     H14"      107.2(19)             .       .       .           no 
 Si1     C15     H15       114.4(14)             .       .       .           no 
 Si1     C15     H15'      110.9(13)             .       .       .           no 
 Si1     C15     H15"      112.3(13)             .       .       .           no 
 H15     C15     H15'         107(2)             .       .       .           no 
 H15     C15     H15"         105(2)             .       .       .           no 
 H15'    C15     H15"      106.9(19)             .       .       .           no 
 Si1     C16     H16       112.5(12)             .       .       .           no 
 Si1     C16     H16'      112.0(13)             .       .       .           no 
 Si1     C16     H16"      112.4(14)             .       .       .           no 
 H16     C16     H16'      106.6(19)             .       .       .           no 
 H16     C16     H16"      107.0(18)             .       .       .           no 
 H16'    C16     H16"      105.9(19)             .       .       .           no 
 Sc      C17     H17        92.4(12)             .       .       .           no 
 Sc      C17     H17'      104.2(12)             .       .       .           no 
 Si2     C17     H17       102.9(13)             .       .       .           no 
 Si2     C17     H17'      107.1(12)             .       .       .           no 
 H17     C17     H17'      104.6(17)             .       .       .           no 
 Si2     C18     H18       108.5(18)             .       .       .           no 
 Si2     C18     H18'      107.5(16)             .       .       .           no 
 Si2     C18     H18"      115.8(19)             .       .       .           no 
 H18     C18     H18'         105(2)             .       .       .           no 
 H18     C18     H18"         111(3)             .       .       .           no 
 H18'    C18     H18"         108(2)             .       .       .           no 
 Si2     C19     H19       112.0(15)             .       .       .           no 
 Si2     C19     H19'      112.5(16)             .       .       .           no 
 Si2     C19     H19"      110.7(15)             .       .       .           no 
 H19     C19     H19'         109(2)             .       .       .           no 
 H19     C19     H19"         109(2)             .       .       .           no 
 H19'    C19     H19"         104(2)             .       .       .           no 
 Si2     C20     H20       109.9(14)             .       .       .           no 
 Si2     C20     H20'      108.9(16)             .       .       .           no 
 Si2     C20     H20"      109.9(17)             .       .       .           no 
 H20     C20     H20'         111(2)             .       .       .           no 
 H20     C20     H20"         107(2)             .       .       .           no 
 H20'    C20     H20"         110(2)             .       .       .           no 
 Sc      C21     H21        99.3(11)             .       .       .           no 
 Sc      C21     H21'      111.1(13)             .       .       .           no 
 Si3     C21     H21       104.5(11)             .       .       .           no 
 Si3     C21     H21'      106.0(13)             .       .       .           no 
 H21     C21     H21'      105.7(17)             .       .       .           no 
 Si3     C22     H22       108.8(14)             .       .       .           no 
 Si3     C22     H22'      114.0(14)             .       .       .           no 
 Si3     C22     H22"      109.8(15)             .       .       .           no 
 H22     C22     H22'         106(2)             .       .       .           no 
 H22     C22     H22"         110(2)             .       .       .           no 
 H22'    C22     H22"         108(2)             .       .       .           no 
 Si3     C23     H23       108.8(14)             .       .       .           no 
 Si3     C23     H23'      112.0(14)             .       .       .           no 
 Si3     C23     H23"      109.8(13)             .       .       .           no 
 H23     C23     H23'      105.7(19)             .       .       .           no 
 H23     C23     H23"      110.9(18)             .       .       .           no 
 H23'    C23     H23"      109.5(18)             .       .       .           no 
 Si3     C24     H24       111.6(13)             .       .       .           no 
 Si3     C24     H24'      108.9(13)             .       .       .           no 
 Si3     C24     H24"      113.0(13)             .       .       .           no 
 H24     C24     H24'      108.3(19)             .       .       .           no 
 H24     C24     H24"      106.8(19)             .       .       .           no 
 H24'    C24     H24"      108.2(19)             .       .       .           no 

loop_
_geom_torsion_atom_site_label_1     
_geom_torsion_atom_site_label_2     
_geom_torsion_atom_site_label_3     
_geom_torsion_atom_site_label_4     
_geom_torsion                       
_geom_torsion_site_symmetry_1       
_geom_torsion_site_symmetry_2       
_geom_torsion_site_symmetry_3       
_geom_torsion_site_symmetry_4       
_geom_torsion_publ_flag             
 N2      Sc      N1      C1       163.74(11)     .       .       .       .   no 
 N2      Sc      N1      C2         44.53(9)     .       .       .       .   no 
 N2      Sc      N1      C8        -74.78(9)     .       .       .       .   no 
 N3      Sc      N1      C1      -121.40(11)     .       .       .       .   no 
 N3      Sc      N1      C2       119.39(10)     .       .       .       .   no 
 N3      Sc      N1      C8          0.07(9)     .       .       .       .   no 
 C13     Sc      N1      C1        60.93(11)     .       .       .       .   no 
 C13     Sc      N1      C2       -58.28(10)     .       .       .       .   no 
 C13     Sc      N1      C8      -177.59(10)     .       .       .       .   no 
 C17     Sc      N1      C1       -35.71(11)     .       .       .       .   no 
 C17     Sc      N1      C2       -154.92(9)     .       .       .       .   no 
 C17     Sc      N1      C8        85.77(10)     .       .       .       .   no 
 C21     Sc      N1      C1       157.30(12)     .       .       .       .   no 
 C21     Sc      N1      C2        38.09(16)     .       .       .       .   no 
 C21     Sc      N1      C8       -81.22(15)     .       .       .       .   no 
 N1      Sc      N2      C3        -51.04(8)     .       .       .       .   no 
 N1      Sc      N2      C4      -167.35(11)     .       .       .       .   no 
 N1      Sc      N2      C5         66.14(9)     .       .       .       .   no 
 N3      Sc      N2      C3       -131.04(9)     .       .       .       .   no 
 N3      Sc      N2      C4       112.65(10)     .       .       .       .   no 
 N3      Sc      N2      C5        -13.86(9)     .       .       .       .   no 
 C13     Sc      N2      C3         31.24(9)     .       .       .       .   no 
 C13     Sc      N2      C4       -85.07(11)     .       .       .       .   no 
 C13     Sc      N2      C5       148.43(10)     .       .       .       .   no 
 C17     Sc      N2      C3      -118.67(15)     .       .       .       .   no 
 C17     Sc      N2      C4       125.03(15)     .       .       .       .   no 
 C17     Sc      N2      C5        -1.48(19)     .       .       .       .   no 
 C21     Sc      N2      C3        126.23(9)     .       .       .       .   no 
 C21     Sc      N2      C4         9.92(10)     .       .       .       .   no 
 C21     Sc      N2      C5      -116.58(10)     .       .       .       .   no 
 N1      Sc      N3      C6        -30.98(8)     .       .       .       .   no 
 N1      Sc      N3      C9       -152.54(9)     .       .       .       .   no 
 N1      Sc      N3      C12        90.77(9)     .       .       .       .   no 
 N2      Sc      N3      C6         39.49(8)     .       .       .       .   no 
 N2      Sc      N3      C9        -82.07(9)     .       .       .       .   no 
 N2      Sc      N3      C12      161.23(10)     .       .       .       .   no 
 C17     Sc      N3      C6       -136.23(9)     .       .       .       .   no 
 C17     Sc      N3      C9        102.22(9)     .       .       .       .   no 
 C17     Sc      N3      C12      -14.48(10)     .       .       .       .   no 
 C21     Sc      N3      C6        123.72(8)     .       .       .       .   no 
 C21     Sc      N3      C9          2.17(9)     .       .       .       .   no 
 C21     Sc      N3      C12      -114.53(9)     .       .       .       .   no 
 N1      Sc      C13     Si1      100.10(14)     .       .       .       .   no 
 N2      Sc      C13     Si1       34.66(14)     .       .       .       .   no 
 C17     Sc      C13     Si1     -155.48(13)     .       .       .       .   no 
 C21     Sc      C13     Si1      -54.89(14)     .       .       .       .   no 
 N1      Sc      C17     Si2       27.71(14)     .       .       .       .   no 
 N2      Sc      C17     Si2       88.90(18)     .       .       .       .   no 
 N3      Sc      C17     Si2      100.51(13)     .       .       .       .   no 
 C13     Sc      C17     Si2      -61.32(13)     .       .       .       .   no 
 C21     Sc      C17     Si2     -157.84(12)     .       .       .       .   no 
 N1      Sc      C21     Si3      -161.28(8)     .       .       .       .   no 
 N2      Sc      C21     Si3     -167.18(10)     .       .       .       .   no 
 N3      Sc      C21     Si3       123.67(9)     .       .       .       .   no 
 C13     Sc      C21     Si3      -66.65(10)     .       .       .       .   no 
 C17     Sc      C21     Si3       31.49(11)     .       .       .       .   no 
 C14     Si1     C13     Sc       143.39(13)     .       .       .       .   no 
 C15     Si1     C13     Sc       -96.86(14)     .       .       .       .   no 
 C16     Si1     C13     Sc        24.55(17)     .       .       .       .   no 
 C18     Si2     C17     Sc       -68.70(15)     .       .       .       .   no 
 C19     Si2     C17     Sc       174.81(13)     .       .       .       .   no 
 C20     Si2     C17     Sc        54.21(15)     .       .       .       .   no 
 C22     Si3     C21     Sc       166.84(10)     .       .       .       .   no 
 C23     Si3     C21     Sc       -72.72(11)     .       .       .       .   no 
 C24     Si3     C21     Sc        48.18(12)     .       .       .       .   no 
 Sc      N1      C2      C3       -31.94(15)     .       .       .       .   no 
 C1      N1      C2      C3      -156.04(13)     .       .       .       .   no 
 C8      N1      C2      C3        86.76(16)     .       .       .       .   no 
 Sc      N1      C8      C6        32.43(14)     .       .       .       .   no 
 C1      N1      C8      C6       158.06(13)     .       .       .       .   no 
 C2      N1      C8      C6       -85.25(15)     .       .       .       .   no 
 Sc      N2      C3      C2        53.23(13)     .       .       .       .   no 
 C4      N2      C3      C2       176.48(13)     .       .       .       .   no 
 C5      N2      C3      C2       -65.44(16)     .       .       .       .   no 
 Sc      N2      C5      C6       -14.76(15)     .       .       .       .   no 
 C3      N2      C5      C6        97.02(14)     .       .       .       .   no 
 C4      N2      C5      C6      -145.70(13)     .       .       .       .   no 
 Sc      N3      C6      C5       -62.53(12)     .       .       .       .   no 
 Sc      N3      C6      C7       178.02(10)     .       .       .       .   no 
 Sc      N3      C6      C8        57.79(11)     .       .       .       .   no 
 C9      N3      C6      C5        56.25(15)     .       .       .       .   no 
 C9      N3      C6      C7       -63.20(16)     .       .       .       .   no 
 C9      N3      C6      C8       176.57(12)     .       .       .       .   no 
 C12     N3      C6      C5       175.53(12)     .       .       .       .   no 
 C12     N3      C6      C7        56.07(16)     .       .       .       .   no 
 C12     N3      C6      C8       -64.16(15)     .       .       .       .   no 
 Sc      N3      C9      C10      -83.84(11)     .       .       .       .   no 
 C6      N3      C9      C10      161.51(12)     .       .       .       .   no 
 C12     N3      C9      C10       37.87(14)     .       .       .       .   no 
 Sc      N3      C12     C11      100.95(12)     .       .       .       .   no 
 C6      N3      C12     C11     -143.07(13)     .       .       .       .   no 
 C9      N3      C12     C11      -18.68(15)     .       .       .       .   no 
 N1      C2      C3      N2       -16.01(19)     .       .       .       .   no 
 N2      C5      C6      N3        54.09(16)     .       .       .       .   no 
 N2      C5      C6      C7       178.42(12)     .       .       .       .   no 
 N2      C5      C6      C8       -63.11(16)     .       .       .       .   no 
 N3      C6      C8      N1       -64.81(15)     .       .       .       .   no 
 C5      C6      C8      N1        53.25(17)     .       .       .       .   no 
 C7      C6      C8      N1       170.87(12)     .       .       .       .   no 
 N3      C9      C10     C11      -42.09(16)     .       .       .       .   no 
 C9      C10     C11     C12       30.07(18)     .       .       .       .   no 
 C10     C11     C12     N3        -7.38(18)     .       .       .       .   no 

loop_
_geom_contact_atom_site_label_1     
_geom_contact_atom_site_label_2     
_geom_contact_distance              
_geom_contact_site_symmetry_1       
_geom_contact_site_symmetry_2       
_geom_contact_publ_flag             
 Sc      H10'      3.371(18)                     .       .                   no 
 Si1     C3       3.8761(17)                     .       .                   no 
 Si1     H3        3.047(17)                     .       .                   no 
 Si2     H1'       3.319(19)                     .       .                   no 
 Si2     H12       3.275(17)                     .       .                   no 
 Si3     H17         3.37(2)                     .       .                   no 
 N1      N2       2.7201(18)                     .       .                   no 
 N1      N3       2.9745(17)                     .       .                   no 
 N1      C3         2.523(2)                     .       .                   no 
 N1      C5         2.969(2)                     .       .                   no 
 N1      C6         2.532(2)                     .       .                   no 
 N1      C13        3.262(2)                     .       .                   no 
 N2      N1       2.7201(18)                     .       .                   no 
 N2      N3       2.8847(17)                     .       .                   no 
 N2      C2         2.500(2)                     .       .                   no 
 N2      C6       2.5210(19)                     .       .                   no 
 N2      C8         3.056(2)                     .       .                   no 
 N2      C9         3.367(2)                     .       .                   no 
 N2      C21        3.351(2)                     .       .                   no 
 N3      C5       2.4527(19)                     .       .                   no 
 N3      N1       2.9745(17)                     .       .                   no 
 N3      N2       2.8847(17)                     .       .                   no 
 N3      C8       2.4363(19)                     .       .                   no 
 N3      C17        3.404(2)                     .       .                   no 
 N2      H9'       2.898(17)                     .       .                   no 
 C1      C4         3.592(2)                     .     7_555                 no 
 C3      Si1      3.8761(17)                     .       .                   no 
 C4      C1         3.592(2)                     .     7_545                 no 
 C13     C21        3.360(2)                     .       .                   no 
 C13     N1         3.262(2)                     .       .                   no 
 C13     C1         3.581(2)                     .       .                   no 
 C13     C3         3.448(2)                     .       .                   no 
 C13     C17        3.406(2)                     .       .                   no 
 C13     C2         3.401(2)                     .       .                   no 
 C17     C13        3.406(2)                     .       .                   no 
 C17     N3         3.404(2)                     .       .                   no 
 C17     C21        3.485(2)                     .       .                   no 
 C17     C12        3.277(2)                     .       .                   no 
 C21     N2         3.351(2)                     .       .                   no 
 C21     C4         3.288(2)                     .       .                   no 
 C21     C9         3.586(2)                     .       .                   no 
 C21     C13        3.360(2)                     .       .                   no 
 C21     C17        3.485(2)                     .       .                   no 
 C1      H4'       3.092(16)                     .     7_555                 no 
 C1      H13'        3.02(2)                     .       .                   no 
 C2      H11'        3.05(2)                     .     6_555                 no 
 C2      H5        2.909(17)                     .       .                   no 
 C3      H15"        3.07(2)                     .       .                   no 
 C4      H21       2.804(19)                     .       .                   no 
 C4      H9'       3.054(17)                     .       .                   no 
 C5      H9'       2.720(17)                     .       .                   no 
 C5      H9        3.002(17)                     .       .                   no 
 C7      H14"        3.03(2)                     .     2_565                 no 
 C7      H12'      2.569(17)                     .       .                   no 
 C7      H9        2.710(16)                     .       .                   no 
 C8      H12'      2.890(17)                     .       .                   no 
 C8      H14"        3.09(2)                     .     2_565                 no 
 C8      H12       2.940(17)                     .       .                   no 
 C9      H7"         2.81(2)                     .       .                   no 
 C9      H5'       2.595(17)                     .       .                   no 
 C9      H21'        3.02(2)                     .       .                   no 
 C11     H17'        2.93(2)                     .       .                   no 
 C12     H17'      2.850(19)                     .       .                   no 
 C12     H7        2.815(19)                     .       .                   no 
 C12     H8        2.544(18)                     .       .                   no 
 C13     H2'       3.072(18)                     .       .                   no 
 C13     H3        2.954(17)                     .       .                   no 
 C13     H1"       3.042(18)                     .       .                   no 
 C14     H5'       3.090(18)                     .     8_554                 no 
 C15     H2'       3.042(19)                     .       .                   no 
 C15     H3        3.007(17)                     .       .                   no 
 C17     H13         3.03(2)                     .       .                   no 
 C17     H12       2.639(18)                     .       .                   no 
 C18     H1'       2.897(19)                     .       .                   no 
 C18     H23         2.96(2)                     .     4_555                 no 
 C18     H12       2.902(18)                     .       .                   no 
 C19     H8'       3.099(17)                     .     6_455                 no 
 C19     H20"        3.10(3)                     .     5_565                 no 
 C21     H4'       3.092(17)                     .       .                   no 
 C21     H4"       3.014(18)                     .       .                   no 
 C21     H9'       3.000(18)                     .       .                   no 
 C21     H10'      3.064(18)                     .       .                   no 
 C21     H13         3.10(2)                     .       .                   no 
 C23     H4        3.097(18)                     .     6_455                 no 
 C24     H13         2.95(2)                     .       .                   no 
 H1      H2          2.53(3)                     .       .                   no 
 H1      H2'         2.56(3)                     .       .                   no 
 H1      H8          2.56(3)                     .       .                   no 
 H1      H8'         2.57(2)                     .       .                   no 
 H1'     Si2       3.319(19)                     .       .                   no 
 H1'     C18       2.897(19)                     .       .                   no 
 H1'     H8          2.23(2)                     .       .                   no 
 H1'     H18"        2.17(4)                     .       .                   no 
 H1"     C13       3.042(18)                     .       .                   no 
 H1"     H2'         2.19(2)                     .       .                   no 
 H1"     H13'        2.34(3)                     .       .                   no 
 H2      H1          2.53(3)                     .       .                   no 
 H2      H8'         2.10(2)                     .       .                   no 
 H2      H19"        2.59(3)                     .     6_555                 no 
 H2'     C13       3.072(18)                     .       .                   no 
 H2'     C15       3.042(19)                     .       .                   no 
 H2'     H1          2.56(3)                     .       .                   no 
 H2'     H1"         2.19(2)                     .       .                   no 
 H2'     H15"        2.59(3)                     .       .                   no 
 H3      Si1       3.047(17)                     .       .                   no 
 H3      C13       2.954(17)                     .       .                   no 
 H3      C15       3.007(17)                     .       .                   no 
 H3      H4'         2.27(2)                     .       .                   no 
 H3      H15"        2.38(3)                     .       .                   no 
 H3      H16         2.60(3)                     .       .                   no 
 H3'     H4          2.39(3)                     .       .                   no 
 H3'     H5          2.27(2)                     .       .                   no 
 H4      H3'         2.39(3)                     .       .                   no 
 H4      H5'         2.44(2)                     .       .                   no 
 H4      C23       3.097(18)                     .     6_555                 no 
 H4      H23         2.57(3)                     .     6_555                 no 
 H4'     C21       3.092(17)                     .       .                   no 
 H4'     H3          2.27(2)                     .       .                   no 
 H4'     H16         2.41(3)                     .       .                   no 
 H4'     H21         2.37(3)                     .       .                   no 
 H4'     C1        3.092(16)                     .     7_545                 no 
 H4"     C21       3.014(18)                     .       .                   no 
 H4"     H5'         2.31(2)                     .       .                   no 
 H4"     H9'         2.41(2)                     .       .                   no 
 H5      C2        2.909(17)                     .       .                   no 
 H5      H3'         2.27(2)                     .       .                   no 
 H5      H7'         2.37(3)                     .       .                   no 
 H5      H8'         2.60(2)                     .       .                   no 
 H5'     C9        2.595(17)                     .       .                   no 
 H5'     H4          2.44(2)                     .       .                   no 
 H5'     H4"         2.31(2)                     .       .                   no 
 H5'     H7"         2.44(3)                     .       .                   no 
 H5'     H9          2.51(2)                     .       .                   no 
 H5'     H9'         2.30(2)                     .       .                   no 
 H5'     C14       3.090(18)                     .     8_555                 no 
 H7      C12       2.815(19)                     .       .                   no 
 H7      H8          2.58(3)                     .       .                   no 
 H7      H12'        2.09(3)                     .       .                   no 
 H7      H14"        2.47(3)                     .     2_565                 no 
 H7'     H5          2.37(3)                     .       .                   no 
 H7'     H8'         2.44(3)                     .       .                   no 
 H7"     C9          2.81(2)                     .       .                   no 
 H7"     H5'         2.44(3)                     .       .                   no 
 H7"     H9          2.16(3)                     .       .                   no 
 H8      C12       2.544(18)                     .       .                   no 
 H8      H1          2.56(3)                     .       .                   no 
 H8      H1'         2.23(2)                     .       .                   no 
 H8      H7          2.58(3)                     .       .                   no 
 H8      H12         2.38(3)                     .       .                   no 
 H8      H12'        2.38(2)                     .       .                   no 
 H8'     H1          2.57(2)                     .       .                   no 
 H8'     H2          2.10(2)                     .       .                   no 
 H8'     H5          2.60(2)                     .       .                   no 
 H8'     H7'         2.44(3)                     .       .                   no 
 H8'     C19       3.099(17)                     .     6_555                 no 
 H8'     H19"        2.41(3)                     .     6_555                 no 
 H9      C5        3.002(17)                     .       .                   no 
 H9      C7        2.710(16)                     .       .                   no 
 H9      H5'         2.51(2)                     .       .                   no 
 H9      H7"         2.16(3)                     .       .                   no 
 H9      H24"        2.60(3)                     .     8_555                 no 
 H9'     N2        2.898(17)                     .       .                   no 
 H9'     C4        3.054(17)                     .       .                   no 
 H9'     C5        2.720(17)                     .       .                   no 
 H9'     C21       3.000(18)                     .       .                   no 
 H9'     H4"         2.41(2)                     .       .                   no 
 H9'     H5'         2.30(2)                     .       .                   no 
 H9'     H21'        2.34(3)                     .       .                   no 
 H10'    Sc        3.371(18)                     .       .                   no 
 H10'    C21       3.064(18)                     .       .                   no 
 H10'    H17'        2.54(3)                     .       .                   no 
 H11     H15"        2.59(3)                     .     6_455                 no 
 H11'    H17'        2.58(3)                     .       .                   no 
 H11'    C2          3.05(2)                     .     6_455                 no 
 H12     Si2       3.275(17)                     .       .                   no 
 H12     C8        2.940(17)                     .       .                   no 
 H12     C17       2.639(18)                     .       .                   no 
 H12     C18       2.902(18)                     .       .                   no 
 H12     H8          2.38(3)                     .       .                   no 
 H12     H17'        2.36(3)                     .       .                   no 
 H12'    C7        2.569(17)                     .       .                   no 
 H12'    C8        2.890(17)                     .       .                   no 
 H12'    H7          2.09(3)                     .       .                   no 
 H12'    H8          2.38(2)                     .       .                   no 
 H13     C24         2.95(2)                     .       .                   no 
 H13     H17         2.59(3)                     .       .                   no 
 H13     H24         2.51(3)                     .       .                   no 
 H13'    C1          3.02(2)                     .       .                   no 
 H13'    H1"         2.34(3)                     .       .                   no 
 H14"    C7          3.03(2)                     .     2_564                 no 
 H14"    C8          3.09(2)                     .     2_564                 no 
 H14"    H7          2.47(3)                     .     2_564                 no 
 H15"    C3          3.07(2)                     .       .                   no 
 H15"    H2'         2.59(3)                     .       .                   no 
 H15"    H3          2.38(3)                     .       .                   no 
 H15"    H11         2.59(3)                     .     6_555                 no 
 H16     H3          2.60(3)                     .       .                   no 
 H16     H4'         2.41(3)                     .       .                   no 
 H17     Si3         3.37(2)                     .       .                   no 
 H17     H13         2.59(3)                     .       .                   no 
 H17'    C11         2.93(2)                     .       .                   no 
 H17'    C12       2.850(19)                     .       .                   no 
 H17'    H10'        2.54(3)                     .       .                   no 
 H17'    H11'        2.58(3)                     .       .                   no 
 H17'    H12         2.36(3)                     .       .                   no 
 H18     H22"        2.54(4)                     .     4_555                 no 
 H18"    H1'         2.17(4)                     .       .                   no 
 H19     H20"        2.36(4)                     .     5_565                 no 
 H19"    H2          2.59(3)                     .     6_455                 no 
 H19"    H8'         2.41(3)                     .     6_455                 no 
 H20"    C19         3.10(3)                     .     5_565                 no 
 H20"    H19         2.36(4)                     .     5_565                 no 
 H21     C4        2.804(19)                     .       .                   no 
 H21     H4'         2.37(3)                     .       .                   no 
 H21'    C9          3.02(2)                     .       .                   no 
 H21'    H9'         2.34(3)                     .       .                   no 
 H22"    H18         2.54(4)                     .     4_545                 no 
 H23     C18         2.96(2)                     .     4_545                 no 
 H23     H4          2.57(3)                     .     6_455                 no 
 H24     H13         2.51(3)                     .       .                   no 
 H24"    H9          2.60(3)                     .     8_554                 no 

#===END of Crystallographic Information File
